# Supplementary material
Source: PubMed Central journal article supplement (PMC4326311)
Supplement: supp_dju407_jnci_JNCI_14_0760_s01.pdf [file supp_dju407_jnci_JNCI_14_0760_s01.pdf]

## Supplemental Information

### PIM Kinase Inhibitor AZD1208 Treats MYC-driven Prostate Cancer

Austin N. Kirschner<sup>1</sup>, Jie Wang<sup>2</sup>, Riet van der Meer<sup>2</sup>, Philip D. Anderson<sup>3</sup>, Omar E. Franco-Coronel<sup>4</sup>, Max H. Kushner<sup>5</sup>, Joel H. Everett<sup>2</sup>, Omar Hameed<sup>2</sup>, Erika K. Keeton<sup>6</sup>, Miika Ahdesmaki<sup>7</sup>, Shaun E. Grosskurth<sup>6</sup>, Dennis Huszar<sup>6</sup>, Sarki A. Abdulkadir<sup>2,8,9</sup>

<sup>1</sup>Department of Radiation Oncology, Vanderbilt University Medical Center, Nashville, TN, USA.

<sup>2</sup>Department of Pathology, Microbiology and Immunology, Vanderbilt University Medical Center, Nashville, TN, USA.

<sup>3</sup>Department of Biological Sciences, Salisbury University, Salisbury, MD, USA.

<sup>4</sup>Department of Urology, Vanderbilt University Medical Center, Nashville, TN, USA.

<sup>5</sup>Department of Biological Sciences, Vanderbilt University, Nashville, TN, USA.

<sup>6</sup>AstraZeneca, Oncology iMED, Waltham, MA, USA.

<sup>7</sup>AstraZeneca, R&D Information, Macclesfield, Cheshire, UK.

<sup>8</sup>Department of Cancer Biology, Vanderbilt University Medical Center, Nashville, TN, USA.

<sup>9</sup>Currently at Department of Urology, Northwestern University Feinberg School of Medicine, Chicago, IL, USA.

Corresponding author: Sarki A. Abdulkadir, Northwestern University Feinberg School of Medicine, Department of Urology, Robert H. Lurie Medical Research Center Rm 6-113, 303 E Superior St., Chicago IL 60611 Tel: 312-503-5032. Email: sarki.abdulkadir@northwestern.edu.

Running title: PIM kinase inhibitor treats prostate cancer

Keywords: AZD1208, mouse model, Pim kinase, prostate cancer, p53

## **SUPPLEMENTAL METHODS**

### **Clonogenic assays and cell line irradiation**

Myc-CaP cells were a gift from Charles L. Sawyers [1, 2]. Clonogenic assays and irradiation are described in the Supplemental Methods. From a single suspension of cells, 200 Myc-CaP cells were distributed into quadruplicate 10-cm plates and incubated overnight. A Shepherd Cs-137 irradiator was used to irradiate the cells and within 30 min, AZD1208 in DMSO or DMSO alone was added to a final concentration of 0.1% DMSO. Colonies were fixed and stained with crystal violet in 50% methanol:50% water after 14 days of undisturbed incubation. Colonies greater than 1 mm in diameter were counted using imaging software [3], and verified by hand-count.

Surviving fraction was determined by the formula:  $SF = \text{colonies counted} / (\text{number of cells plated} \times \text{plating efficiency})$ .

### **Immunoblotting**

For immunoblotting, protein was transferred to Hybond-P PVDF membrane (Fisher Scientific, Pittsburgh, PA), blocked for 1 h in 5% milk in Tris-buffered saline pH 7.4 supplemented with 0.1% Tween-20 (Sigma, St. Louis, MO), and incubated overnight at 4°C in primary anti-Pim1 mouse monoclonal antibody 12H8 (Santa Cruz) at 1:1000 dilution or anti-actin goat polyclonal antibody C-11 (Santa Cruz Biotechnologies, Santa Cruz, CA) at 1:1000 dilution in blocking solution. After washing, secondary antibody incubation with either goat anti-mouse-IgG-HRP conjugate (Biorad, Hercules, CA) at 1:3333 dilution or donkey anti-goat-IgG-HRP conjugate at 1:3333 in blocking solution was performed for 1 h at room temperature. Chemiluminescence was stimulated by Western Lightening Plus ECL reagents (Perkin Elmer, Akron, OH) and detected on HyBlot CL Film (Denville Scientific, South Plainfield, NJ).

## **Tumor allografts and xenografts**

Male athymic nude mice (Fox-n1<sup>nu/nu</sup>, Harlan Sprague Dawley, Indianapolis, IN, USA) were used for implantation of Myc-Cap allografts. A single-cell suspension of Myc-CaP cells (C. Sawyers) or PC3 cells (ATCC) was mixed with Matrigel (BD Biosciences, San Jose, CA), and allografting was performed by injecting subcutaneously  $2 \times 10^6$  cells in 0.1 mL Matrigel into each hindlimb (just above the knee) for the radiation experiments or into each flank for non-radiation experiments. Grafts were measured by calipers in two orthogonal dimensions and graft volume was determined by the formula:  $0.5 \times \text{axis}_{\text{long}} \times \text{axis}_{\text{short}}^2$  [4]. On the last day of drug treatment within 9 hours of drug administration, mouse kidneys with tissue grafts were harvested 3 hours after intraperitoneal injection of 5-bromo-2'-deoxyuridine (BrdU, Sigma-Aldrich, St. Louis, MO) at 50 mg/kg mouse weight, carefully bisected and then fixed overnight in Protocol 10% zinc-formalin (Fisher Scientific, Kalamazoo, MI, USA), then transferred into 70% ethanol in water for tissue processing and paraffin embedding at the Translational Pathology Shared Resource laboratory at Vanderbilt University Medical Center. Sections were stained with H&E and analyzed by light microscopy. Slides were reviewed in a treatment-blinded fashion by a board-certified pathologist O.H. and scored based on the number of abnormal prostate gland foci (PIN).

For DU145 and CWR22Rv1 cell xenografts, 5-7 week old male NCR nude (Taconic, Germantown, NY) or CB17 SCID (Charles River Labs, Wilmington, MA) mice were implanted with DU145 or CWR22Rv1 cells (ATCC) ( $6 \times 10^6$ ), with matrigel for CWR22Rv1 and PC3 cells, subcutaneously into the flanks. When graft size reached  $\sim 150\text{-}200\text{mm}^3$ , mice were randomized and treated once daily with either vehicle, 0.5% Methocel E4M (Gallipot, St. Paul,

MN, USA)/0.1% Tween 80, or AZD1208 by oral gavage with 10 mice per group. Docetaxel was dosed at 6 mg/kg once weekly by IV injection.

### **Immunohistochemistry**

This was performed as described [5]. We used the following primary antibodies with Ph 6.0 antigen retrieval: BrdU (mouse, 1:400, 3G26, Santa Cruz Biotechnology, Santa Cruz, CA), cleaved caspase-3 (rabbit, 1:100, Cell Signaling Technology, Beverly, MA), smooth muscle actin (mouse, 1:2000, Sigma-Aldrich, St. Louis, MO), and GFP that is cross-reactive with YFP (rabbit, 1:500, ab6556, Abcam, Cambridge, MA, USA). For mouse antibodies, treated with Mouse On Mouse (M.O.M.) blocking reagent for 1 h at room temperature (1:60, Vector Labs, Burlingame, CA, USA), followed by background blocking and antibody staining.

Retrieval was performed in 10 mmol/L Tris, 1 mmol/L EDTA, pH 9.0 for the following primary antibodies: c-MYC (rabbit, 1:15000 for 72 hours at 4°C, N-262, Santa Cruz Biotechnology), Pim1 (rabbit, 1:100, Cell Signaling), for immunofluorescence GFP that is cross-reactive with YFP (anti-GFP chicken IgY antibody ab13970, 1:1000, Abcam), phospho-Bad-S112 (rabbit, 1:50, Cell Signaling). The reactivity of ab6556 anti-GFP antibody was verified by immunohistochemical staining of positive and negative control slides. Double immunofluorescence staining was performed for primary anti-MYC and anti-Pim1 with secondary FITC-labeled Tyramide Signal Amplification (1:100, Perkin-Elmer).

Quantification of BrdU and cleaved caspase-3 staining was accomplished by counting the number of positive cells and negative cells per high-powered field in the most affected regions of the tissue section. For Myc-CaP cells, at least 12 independent HPFs were examined from 3 independent tumor samples for each category. For Pim1/c-MYC tissue recombination grafts, at

least 5-12 independent HPFs were examined from 3-10 independent tumor samples for each category.

### **RNA-seq**

RNA samples were submitted to BGI (Cambridge, MA, USA) for RNA-sequencing. Bcbio-nextgen (<https://github.com/chapmanb/bcbio-nextgen>) was used for automated high throughput sequencing analysis which included read quality control, alignment to the mouse genome mm10 padded with ERCC RNA spike-in controls (Life Technologies, Grand Island, NY, USA), and quantification of the raw sequence data to Ensembl gene annotation. The following software was utilized within bcbio-nextgen: cutadapt 1.3, fastqc 0.10.1, bowtie2.1.0, tophat 2.0.10, htseq 0.5.4p5, cufflinks2.1.1 and rnaseq 1.1.7 [6-11]. With respect to the ERCC RNA spike-in controls, samples correlated strongly between the two control mixtures providing high confidence for sequencing reproducibility and sensitivity. The sequencing files were submitted as project PRJEB5525 to the European Nucleotide Archive (<http://www.ebi.ac.uk/ena/>).

For DAVID Functional Annotation Clustering, the on-line tools provided at <http://david.abcc.ncifcrf.gov> were used to perform analyses [12-14]. For each statistical comparison, genes were identified that had an absolute value  $\geq 1$  log<sub>2</sub> fold-change in expression and  $\leq 0.05$  raw p-value from a Student's T-test for the gene collapsed log<sub>2</sub> (FPKM+1) expression value (Supplemental\_Data\_MycCaP\_Log2\_FPKM\_RNAseq\_Aanalysis.xlsx document). For each test, the statistically significant up-regulated and down-regulated gene sets were ran separately for functional annotation clustering to identify biological processes that are over-represented with directional change. After submitting a gene set list using the official gene symbol, the "Mus musculus" species was selected to identify functional clusters over-represented with directional

change for a given treatment. Results from the functional annotation clustering were exported as tab delimited text files and select results provided.

For GSEA, the GUI provided at <http://www.broadinstitute.org/gsea/index.jsp> was used to perform analysis [15, 16]. A tab delimited .gct and .cls file was generated separately for the gene collapsed  $\log_2(\text{FPKM}+1)$  expression data for the in vitro and in vivo Myc-CaP AZD1208 treated versus DMSO and AZD1208 treated versus control, respectively. For each analysis, the .gct, .cls, and .gmt (c2.all.v4.0.symbols.gmt from GeneSigDB website) files were loaded into GSEA [17]. When running GSEA, the following parameters were used: 1000 permutations, treated versus control phenotype labels, true for collapse to gene symbol, gene\_set for permutation type, and chip platforms GENE\_SYMBOL.chip, Agilent\_MouseGenome.chip, Illumina\_MusRef8\_v1\_1.chip, Mouse430A\_2.chip, as well as RefSeq\_NP\_Mouse.chip to capture as many gene symbols as possible. Results were transferred to Excel for parsing and select results provided.

## Supplemental Figures

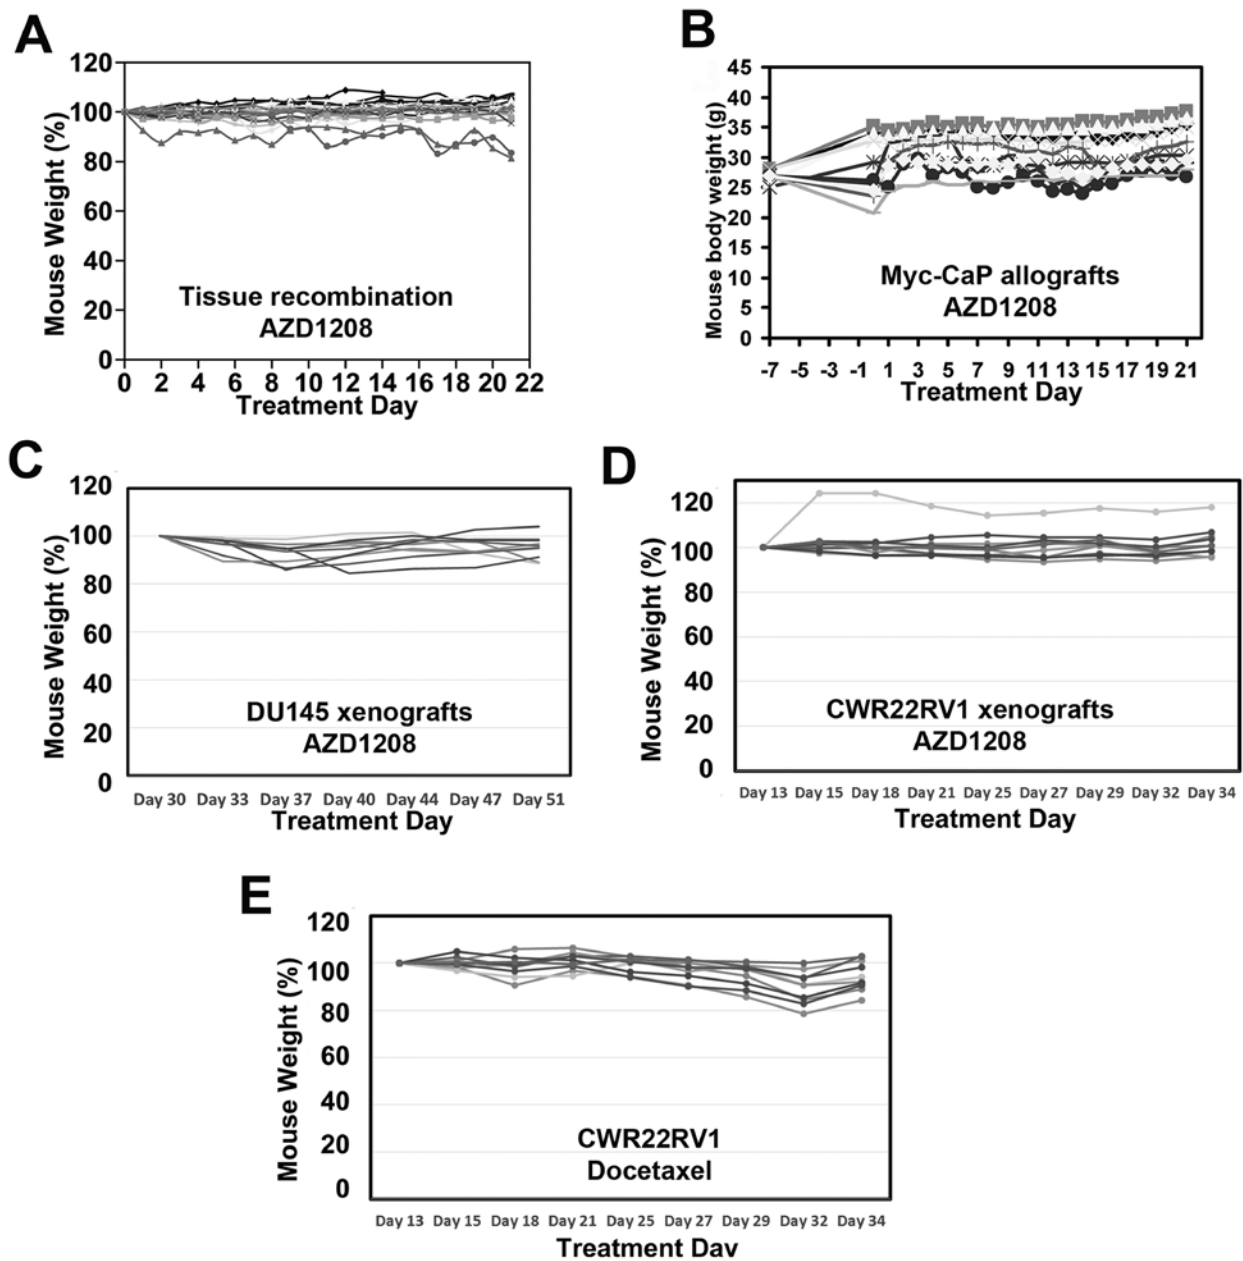

**Figure S1. Percent change in mouse weight with AZD1208 or docetaxel treatment. (A)** Tissue recombination prostate regeneration experiment. (N=3-6 per group) **(B)** Myc-CaP allograft experiment. (N=6-8 per group) **(C)** DU145 xenograft experiment. (N=10 per group) **(D),** **(E)** CWR22Rv1 experiment. (N=10 per group)

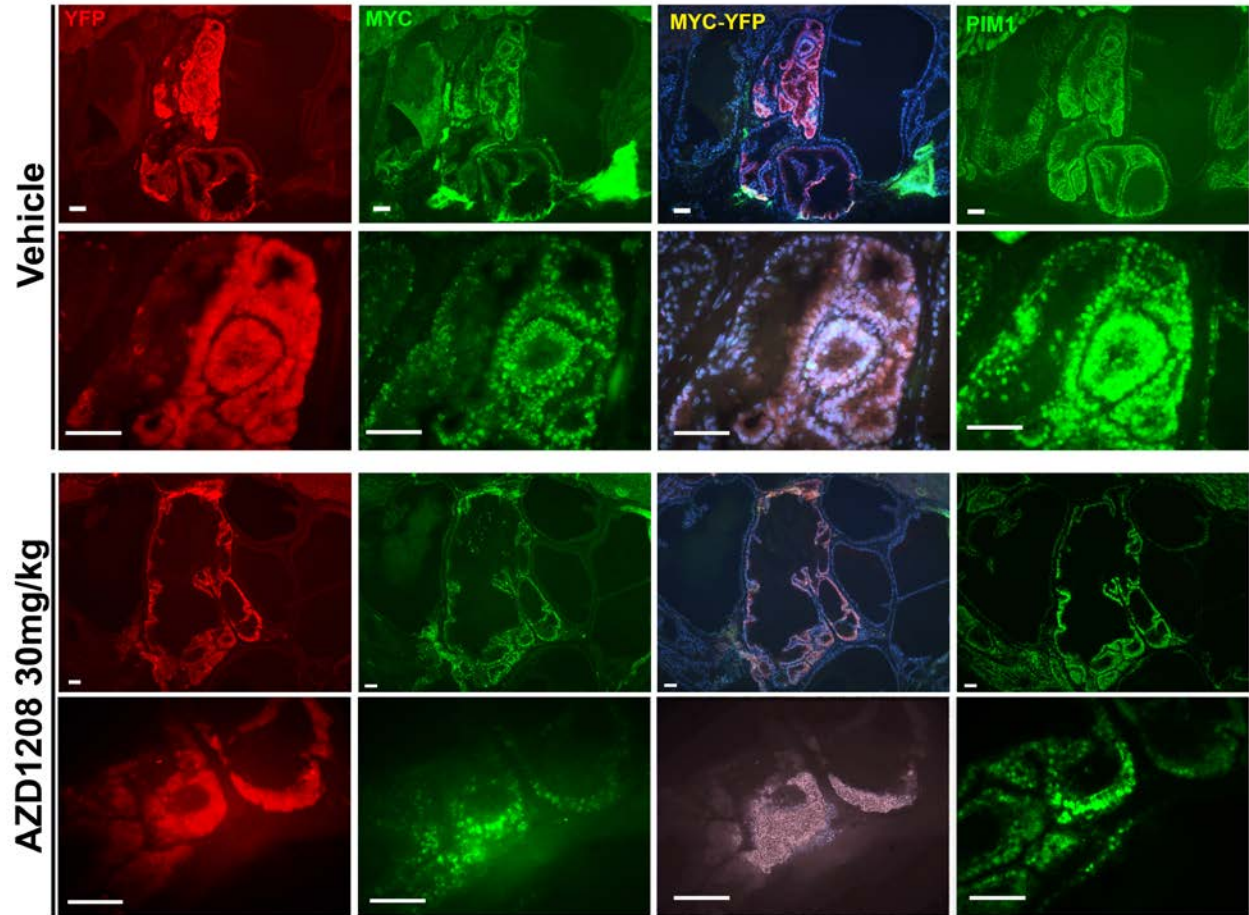

**Figure S2. Colocalization of Pim1, MYC, and YFP in prostate grafts.** YFP (red), c-MYC (green, 2<sup>nd</sup> column), and Pim1 (green, 4<sup>th</sup> column) immunofluorescence in tissue recombination prostate grafts demonstrate co-localization and overexpression of c-MYC and Pim1 for both vehicle-treated and drug-treated specimens (3<sup>rd</sup> column). 4',6-diamidino-2-phenylindole (DAPI) nuclear stain is blue. Scale bars = 0.05mm.



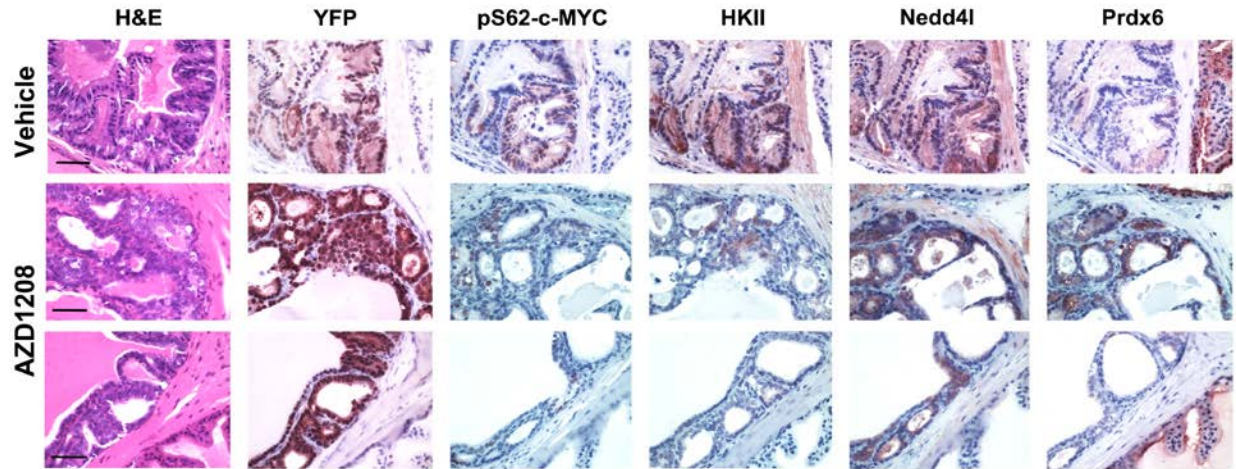

**Figure S3. Immunohistochemical stains on tissue recombination prostate grafts for targets related to c-MYC. (A)** Adjacent sections stained with H&E and YFP identify abnormal glands (PIN) that express lentiviral c-MYC and Pim1. Pim kinase inhibitor AZD1208 treatment appears to decrease the expression of phospho-S62-c-MYC and hexokinase-II. Scale bars = 0.05mm.

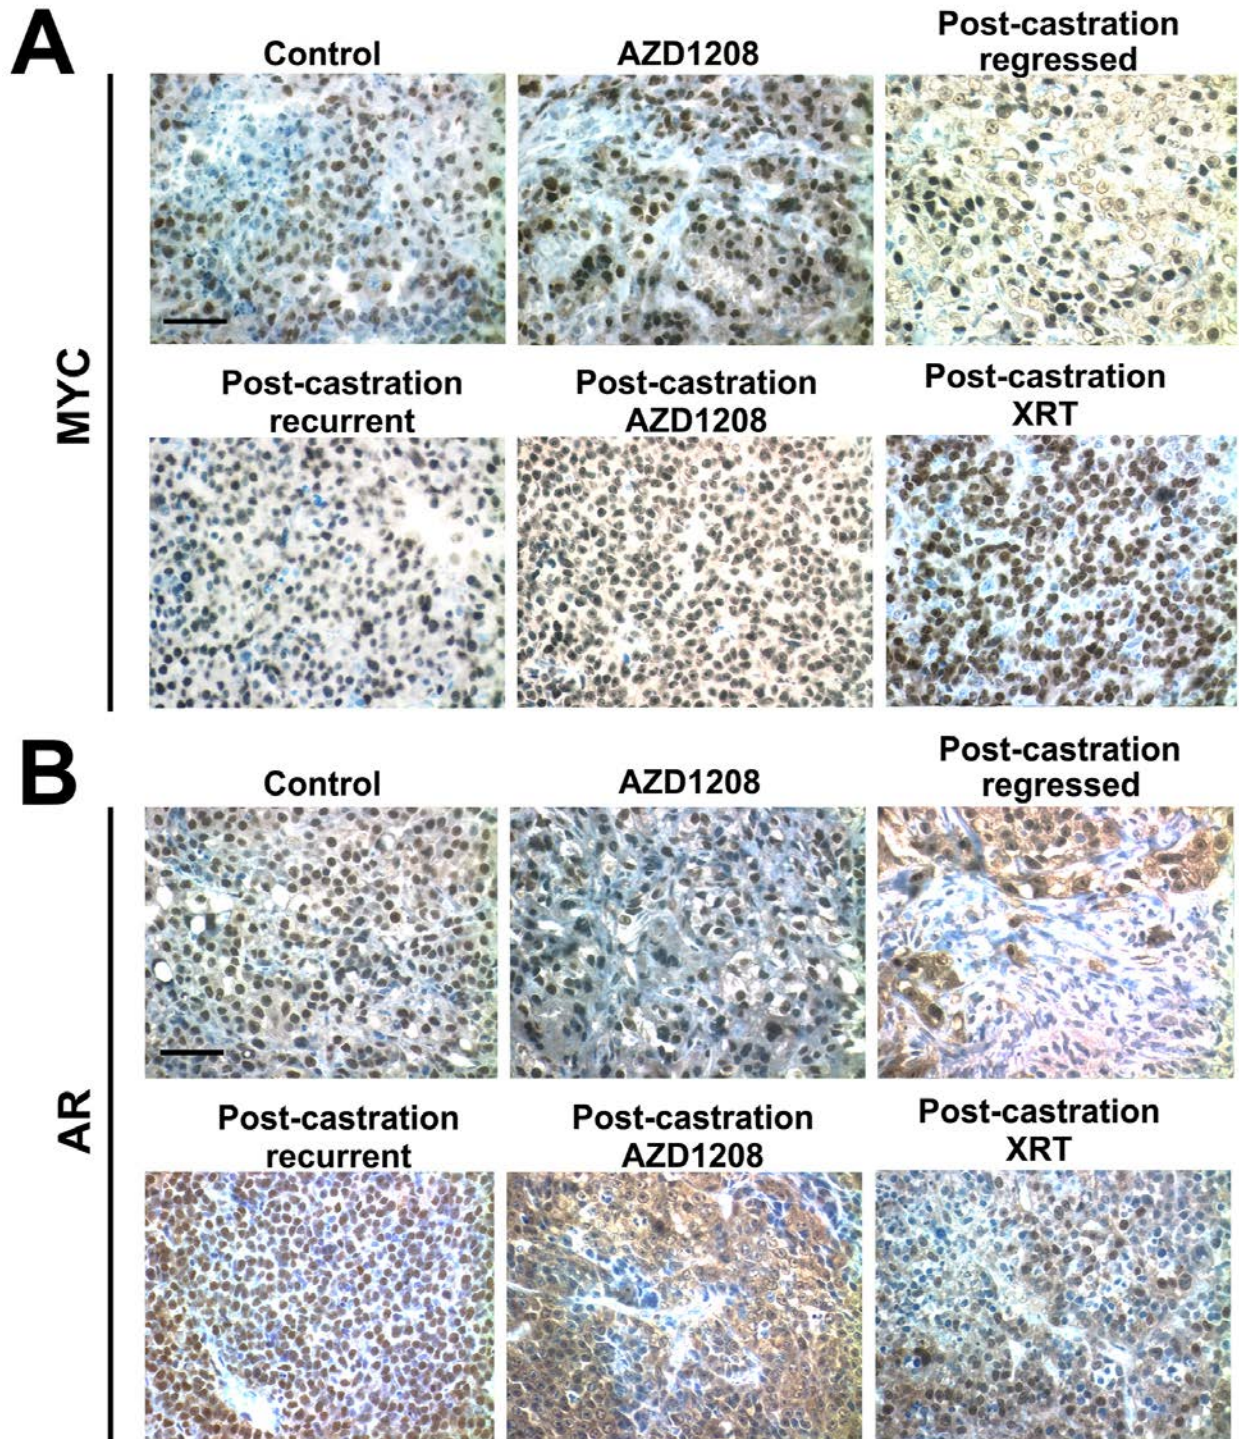

**Figure S4. Heterogeneous expression of MYC and AR in regressed Myc-CaP tumors.**

(A) MYC immunohistochemistry shows heterogeneous MYC expression in regressed Myc-CaP tumors post-castration. MYC expression is more uniform in tumors from control and AZD1208-

treated mice as well as recurrent tumors in vehicle-, AZD1208- or radiation (XRT)-treated mice.

**(B)** AR immunohistochemistry reveals heterogeneous nuclear and cytoplasmic expression in regressed tumors after castration. Nuclear AR expression in a more uniform pattern is observed in uncastrated control and AZD1208-treated tumors and in recurrent tumors from vehicle-treated or radiation (XRT)-treated mice. Recurrent tumors in AZD1208-treated mice show nuclear and cytoplasmic AR expression. Scale bar: 50  $\mu$ m.

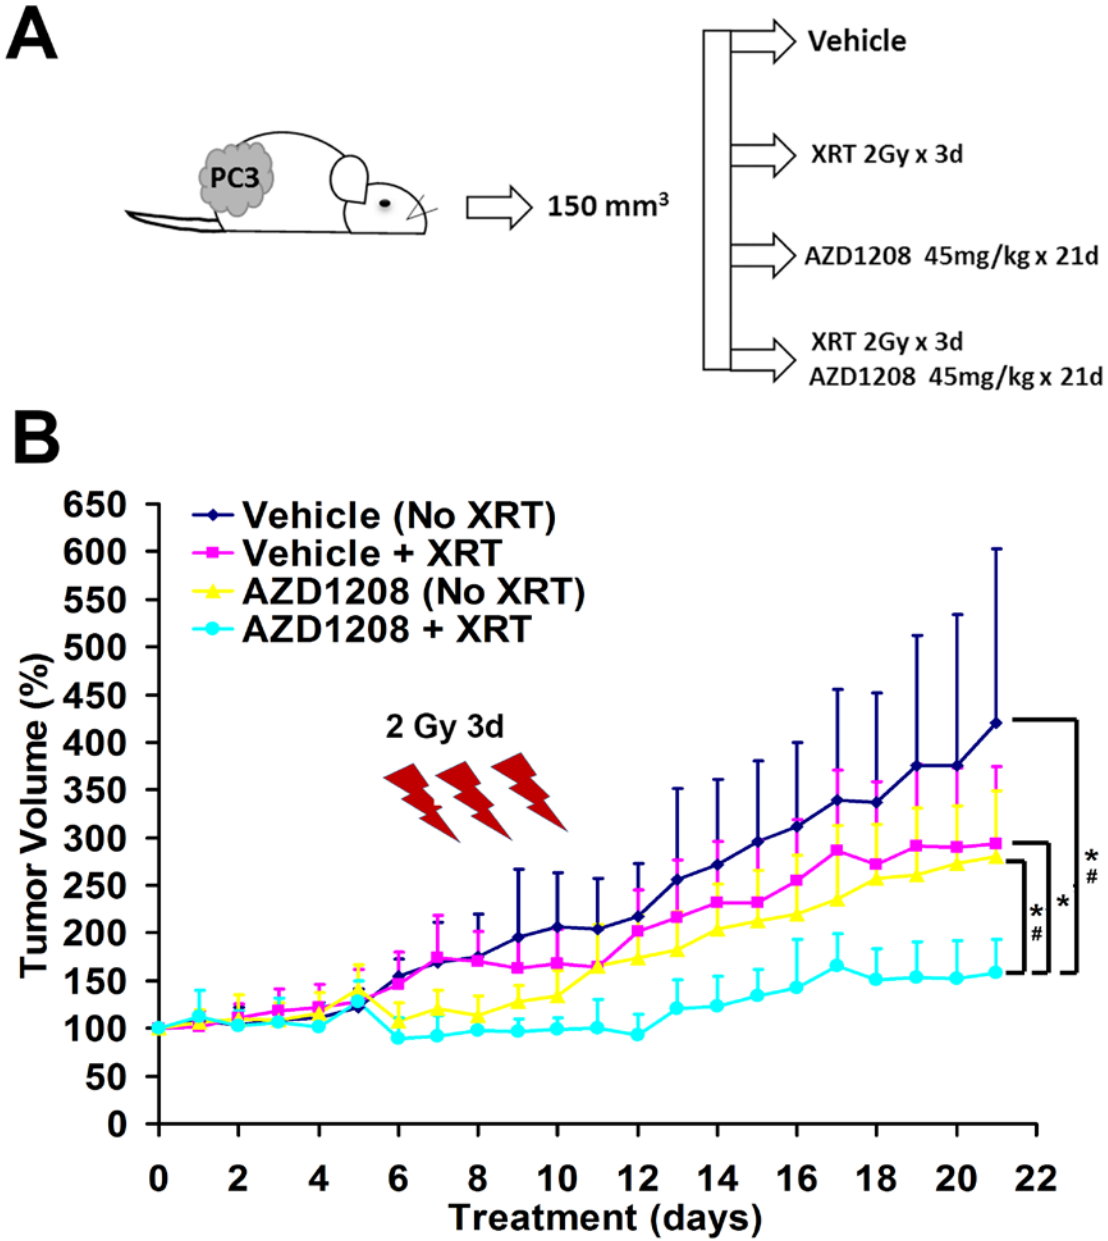

**Figure S5. AZD1208 and radiation treatment of human prostate cancer cell line PC3 in xenografts.** (A) Schematic of PC3 xenograft experiment and (B) growth curves of PC3

xenografts that were treated with daily with Pim kinase inhibitor AZD1208 at 45 mg/kg or vehicle. Additionally, some mice received 3 daily treatments of 2 Gy of radiation (XRT).

AZD1208-only and radiation-only treated tumors had a delay in growth, but AZD plus radiation

treated tumors show the most sustained inhibition of growth. N=4-6 per group. Results shown as mean  $\pm$  SD. \*Student's T-test  $p < 0.05$ . #Mann-Whitney rank sum test significance at  $< 0.05$ .

## REFERENCES

1. Ellwood-Yen K, Graeber TG, Wongvipat J, *et al.* Myc-driven murine prostate cancer shares molecular features with human prostate tumors. *Cancer Cell* 2003;4(3):223-38.
2. Watson PA, Ellwood-Yen K, King JC, *et al.* Context-dependent hormone-refractory progression revealed through characterization of a novel murine prostate cancer cell line. *Cancer Res* 2005;65(24):11565-71.
3. Niyazi M, Niyazi I, Belka C. Counting colonies of clonogenic assays by using densitometric software. *Radiat Oncol* 2007;2:4.
4. Yoshida A, Fukazawa M, Ushio H, *et al.* Study of cell kinetics in anaplastic thyroid carcinoma transplanted to nude mice. *J Surg Oncol* 1989;41(1):1-4.
5. Hittelman WN, Liao Y, Wang L, *et al.* Are cancer stem cells radioresistant? *Future Oncol* 2010;6(10):1563-76.
6. Martin M. Cutadapt removes adapter sequences from high-throughput sequencing reads. *EMBnet. journal* 2011;17(1):10-12.
7. Andrews S. FastQC: A quality control tool for high throughput sequence data. 2010; <http://www.bioinformatics.babraham.ac.uk/projects/fastqc/>.
8. Langmead B, Salzberg SL. Fast gapped-read alignment with Bowtie 2. *Nat Methods* 2012;9(4):357-9.
9. Kim D, Pertea G, Trapnell C, *et al.* TopHat2: accurate alignment of transcriptomes in the presence of insertions, deletions and gene fusions. *Genome Biol* 2013;14(4):R36.
10. Anders S, Huber W. Differential expression analysis for sequence count data. *Genome Biol* 2010;11(10):R106.
11. Trapnell C, Roberts A, Goff L, *et al.* Differential gene and transcript expression analysis of RNA-seq experiments with TopHat and Cufflinks. *Nat Protoc* 2012;7(3):562-78.
12. Huang da W, Sherman BT, Lempicki RA. Systematic and integrative analysis of large gene lists using DAVID bioinformatics resources. *Nat Protoc* 2009;4(1):44-57.
13. Huang da W, Sherman BT, Tan Q, *et al.* DAVID Bioinformatics Resources: expanded annotation database and novel algorithms to better extract biology from large gene lists. *Nucleic Acids Res* 2007;35(Web Server issue):W169-75.
14. Huang da W, Sherman BT, Lempicki RA. Bioinformatics enrichment tools: paths toward the comprehensive functional analysis of large gene lists. *Nucleic Acids Res* 2009;37(1):1-13.
15. Mootha VK, Lindgren CM, Eriksson KF, *et al.* PGC-1alpha-responsive genes involved in oxidative phosphorylation are coordinately downregulated in human diabetes. *Nat Genet* 2003;34(3):267-73.
16. Subramanian A, Tamayo P, Mootha VK, *et al.* Gene set enrichment analysis: a knowledge-based approach for interpreting genome-wide expression profiles. *Proc Natl Acad Sci U S A* 2005;102(43):15545-50.

17. Culhane AC, Schroder MS, Sultana R, *et al.* GeneSigDB: a manually curated database and resource for analysis of gene expression signatures. *Nucleic Acids Res* 2012;40(Database issue):D1060-6.
